# Supplementary material for: Rate enhancement of the Morita–Baylis–Hillman reaction through mechanochemistry
Source: Royal Society of Chemistry journal article supplement (doi:10.1039/b612983h), 2007-01-01

## Rate Enhancement of the Morita-Baylis-Hillman Reaction through Mechanochemistry.

James Mack\* and Maxwell Shumba

*Department of Chemistry, University of Cincinnati, Cincinnati, OH, 45221*

RECEIVED DATE (automatically inserted by publisher); james.mack@uc.edu

### Supporting Information

#### General Information:

<sup>1</sup>H NMR spectra were recorded on a Bruker Avance 400 spectrometer. Deuterated NMR solvents were obtained from Cambridge Isotope Laboratories, Inc., Andover MA, and used without further purification. Methyl acrylate, *p*-nitrobenzaldehyde, *p*-bromobenzaldehyde, *p*-chlorobenzaldehyde, anisaldehyde, benzaldehyde, diazabicyclo[2.2.2]octane, quinuclidine, tetramethyl guanidine, quinuclidinol, 4-dimethylaminopyridine, 1,5-diazabicyclo[4.3.0.]non-5-ene, hexamethylenetetramine, triphenylphosphine, imidazole and sodium sulfide were purchased from Acros Organics and used without further purification. 2,8,9 trimethyl-2,5,8,9-tetraaza-1phospha-bicyclo[3.3.3]undecane was purchased from Aldrich Chemical Company and used without further purification. Ball milling was carried out in an 8000M SpexCertiprep Mixer/Mill. Separation was done using an Isco Combiflash Companion column system.

**Typical Procedure:** methyl acrylate (0.43g, 5 mMol), *p*-nitrobenzaldehyde (0.76g, 5mMol) and DABCO (0.11g, 1mMol) were added to a custom-made 2.0 inch by 0.5 inch screw capped stainless steel vial along with a 0.125 inch stainless steel ball bearing. The vial was placed in an 8000M Spex Certiprep mixer/mill and the contents were ball milled for 0.5 h. The resulting mixture was dissolved in CH<sub>2</sub>Cl<sub>2</sub> (10mL) and extracted with 10%HCl (3 x 10mL). The combined organic layers were dried over anhydrous MgSO<sub>4</sub> and the solvent was evaporated under reduced pressure. The resulting yellow mixture was purified by column chromatography over silica gel (1:1 CH<sub>2</sub>Cl<sub>2</sub>/ethyl acetate) to afford 2-Hydroxy-(4-nitro-phenyl)-methyl]-acrylic acid methyl ester in 98% yield.

<sup>1</sup>H NMR Data:

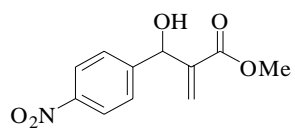

(Table 1, entry 1) The data for this compound is in agreement with the literature:  
Aggarwal, V. K.; Emme, I.; Fulford, S. Y. *J.Org.Chem* **2003**, 68, 692-700.

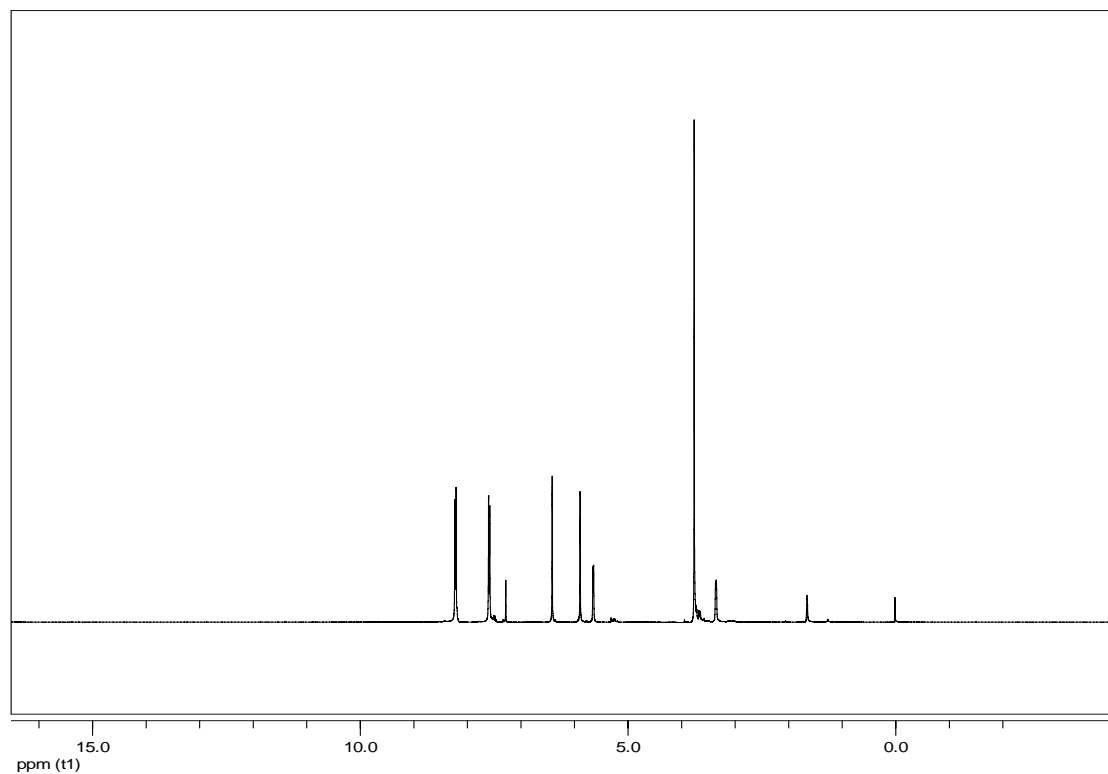

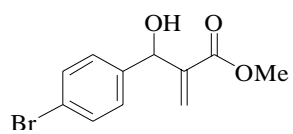

(Table 1, entry 2)

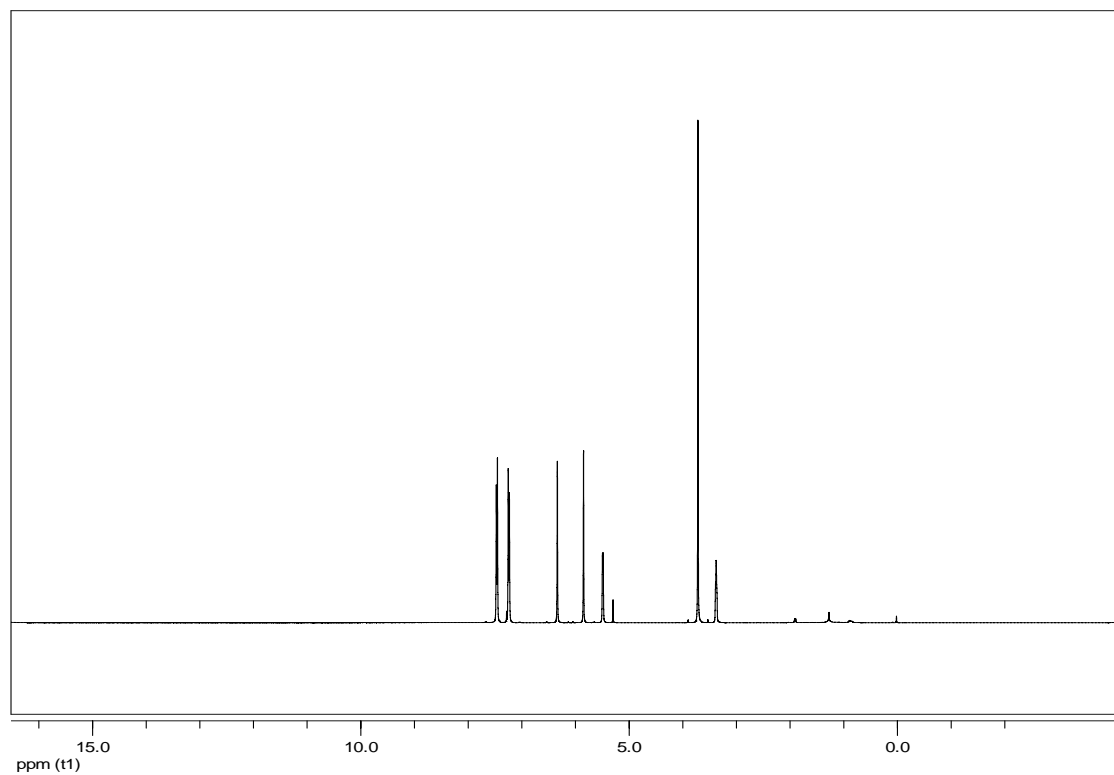

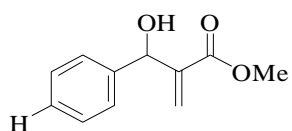

(Table 1, entry 3) The data for this compound is in agreement with the literature:  
 Aggarwal, V. K.; Emme, I.; Fulford, S. Y. *J.Org.Chem* **2003**, 68, 692-700.

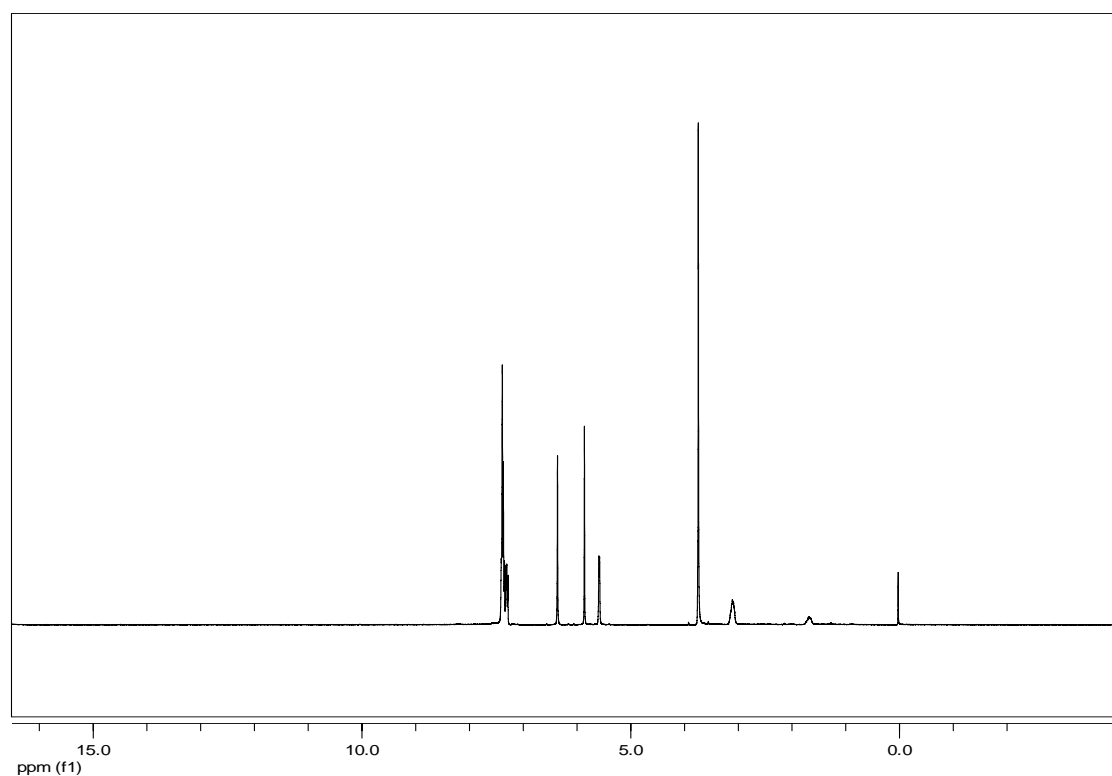

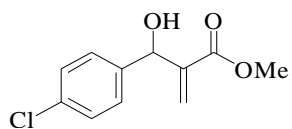

(Table 1, entry 4) The data for his compound is in agreement with the literature:  
 Aggarwal, V. K.; Emme, I.; Fulford, S. Y. *J.Org.Chem* **2003**, 68, 692-700.

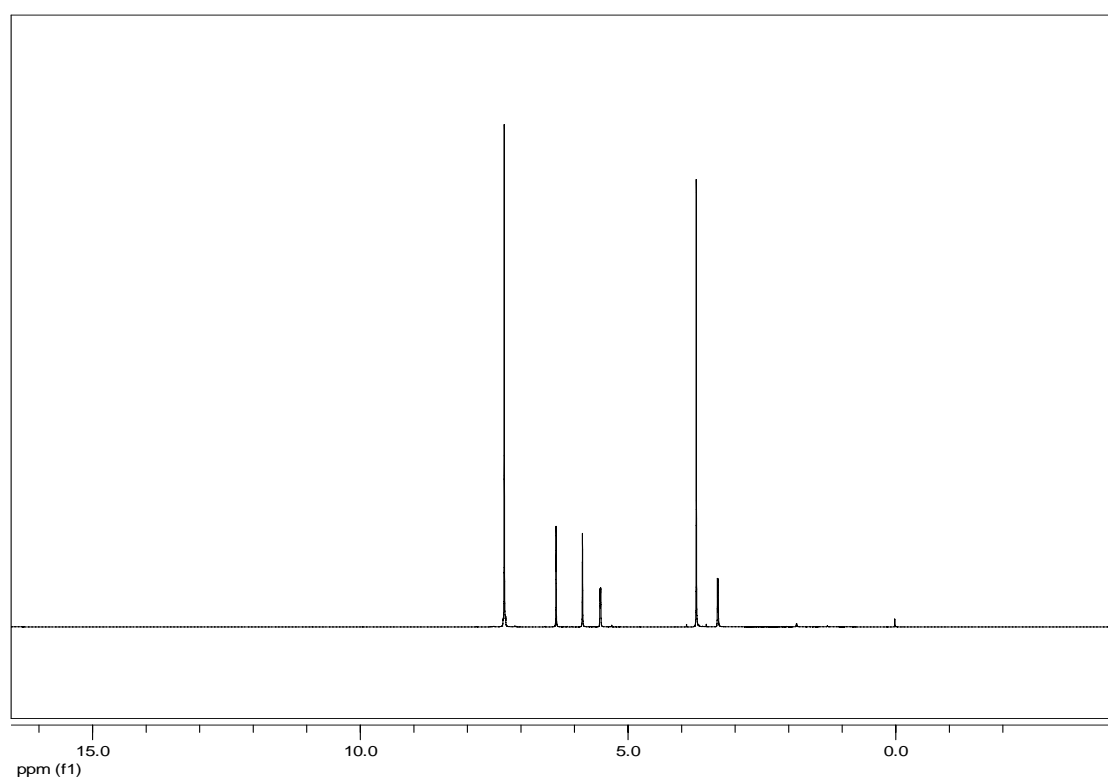

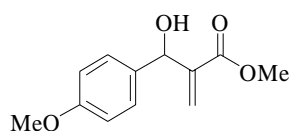

(Table 1, entry 5) The data for this compound is in agreement with the literature:  
 Aggarwal, V. K.; Emme, I.; Fulford, S. Y. *J.Org.Chem* **2003**, 68, 692-700.

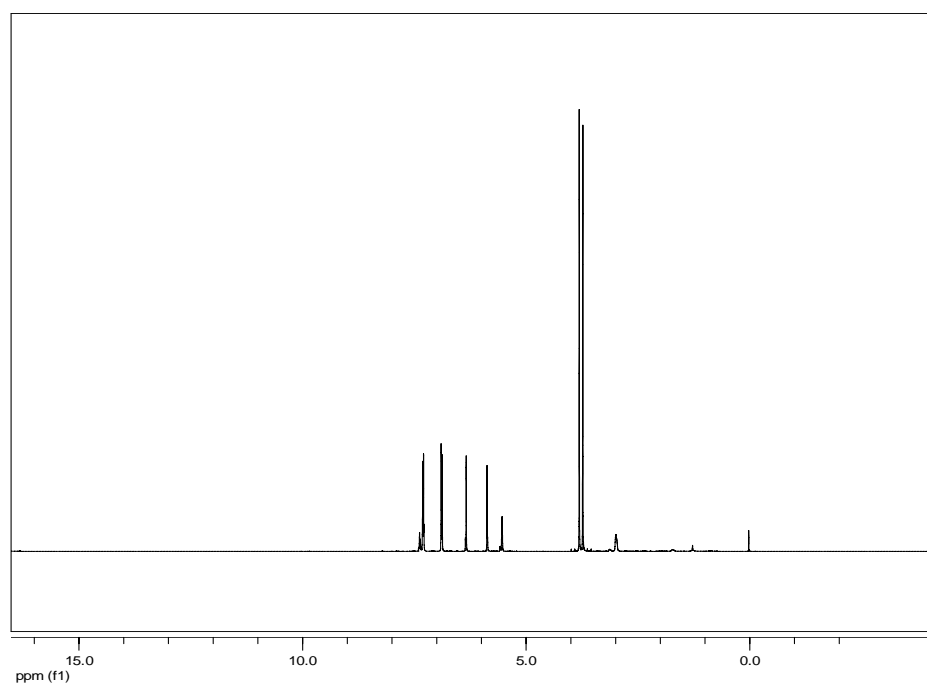

## Design of Reaction Vials

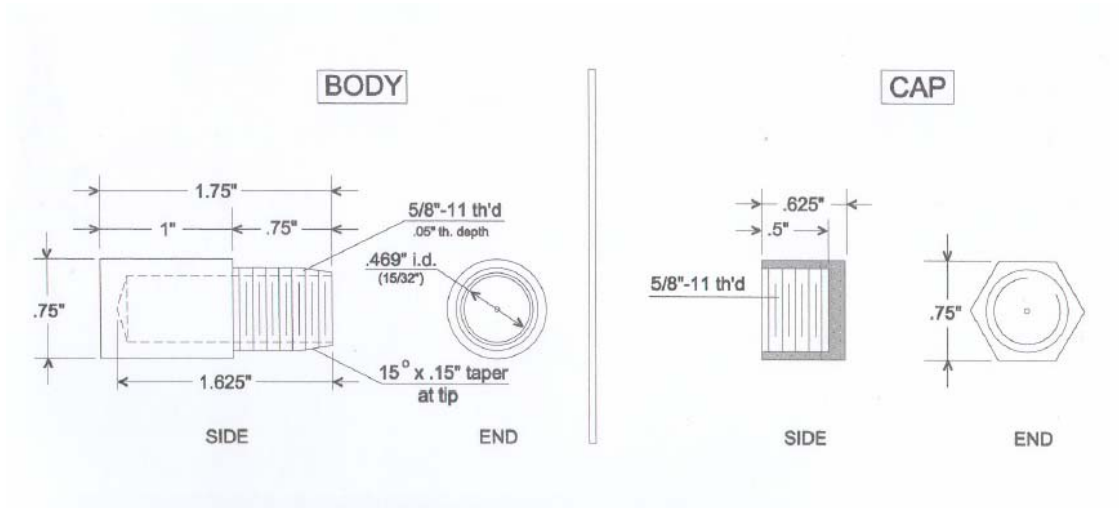

Supplement: b612983h.pdf [file b612983h.pdf]
